# Supplementary material for: 2-[2-(4-(trifluoromethyl)phenylamino)thiazol-4-yl]acetic acid (Activator-3) is a potent activator of AMPK
Source: PubMed Central journal article supplement (PMC6018554; doi:10.1038/s41598-018-27974-1), 2018-06-25
Supplement: 41598_2018_27974_MOESM1_ESM.pdf [file 41598_2018_27974_MOESM1_ESM.pdf]

## Supplementary tables and figures

2-[2-(4-(trifluoromethyl)phenylamino)thiazol-4-yl]acetic acid (Activator-3) is a potent activator  
of AMPK

Navneet Bung<sup>1+</sup>, Sobhitha Surepalli<sup>2+</sup>, Sriram Seshadri<sup>3</sup>, Sweta Patel<sup>3</sup>, Saranya Peddasomayajula<sup>2</sup>, Lalith Kumar Kummari<sup>2@#</sup>, Sireesh T Kumar<sup>4</sup>, Phanithi Prakash Babu<sup>4</sup>, Kishore V.L. Parsa<sup>2</sup>, Rajamohan Reddy Poondra<sup>2</sup>, Gopalakrishnan Bulusu<sup>1,2\*</sup> and Parimal Misra<sup>2\*</sup>

+Equal contributors

\*Corresponding authors: [g.bulusu@tcs.com](mailto:g.bulusu@tcs.com); [parimalm@drils.org](mailto:parimalm@drils.org)

**Table S1:** Activity change observed in the selected 100 protein kinases tested against Activator-3 at 10 $\mu$ M concentration.

| No. | Protein Kinase | Control (CPM) | Test (CPM) | Difference Test-Control | % Activity | % Change |
|-----|----------------|---------------|------------|-------------------------|------------|----------|
| 1   | ABL1           | 574,777       | 561,149    | 13,628                  | 98%        | 2%       |
| 2   | AKT1           | 256,826       | 231,604    | 25,222                  | 90%        | 10%      |
| 3   | ASK1           | 63,215        | 65,142     | (1,927)                 | 103%       | -3%      |
| 4   | AURORA A       | 57,230        | 51,188     | 6,042                   | 89%        | 11%      |
| 5   | AXL            | 27,937        | 27,537     | 400                     | 99%        | 1%       |
| 6   | BMPR2          | 52,011        | 49,850     | 2,161                   | 96%        | 4%       |
| 7   | BRK            | 97,389        | 105,326    | (7,937)                 | 108%       | -8%      |
| 8   | BTK            | 19,951        | 19,215     | 736                     | 96%        | 4%       |
| 9   | BUB1B          | 5,894         | 5,416      | 478                     | 92%        | 8%       |
| 10  | CAMK1 beta     | 692,242       | 723,296    | (31,054)                | 104%       | -4%      |
| 11  | CAMKK2         | 73,703        | 46,831     | 26,872                  | 64%        | 36%      |
| 12  | CASK           | 1,676         | 1,542      | 134                     | 92%        | 8%       |
| 13  | CDK1/CyclinA1  | 119,703       | 109,114    | 10,589                  | 91%        | 9%       |
| 14  | CDK2/CyclinA1  | 142,944       | 103,234    | 39,710                  | 72%        | 28%      |
| 15  | CDK4/CyclinD3  | 82,745        | 86,478     | (3,733)                 | 105%       | -5%      |
| 16  | CHK1           | 71,583        | 72,993     | (1,410)                 | 102%       | -2%      |
| 17  | CK1 alpha 1    | 72,832        | 66,138     | 6,694                   | 91%        | 9%       |
| 18  | c-KIT          | 35,085        | 36,179     | (1,094)                 | 103%       | -3%      |
| 19  | CLK1           | 230,212       | 243,270    | (13,058)                | 106%       | -6%      |
| 20  | CSK            | 202,650       | 203,223    | (573)                   | 100%       | 0%       |
| 21  | DAPK1          | 123,986       | 123,065    | 921                     | 99%        | 1%       |
| 22  | DCAMKL1        | 46,200        | 39,568     | 6,632                   | 86%        | 14%      |
| 23  | DDR1           | 14,327        | 3,006      | 11,321                  | 21%        | 79%      |
| 24  | DMPK           | 85,414        | 98,852     | (13,438)                | 116%       | -16%     |
| 25  | DYRK1A         | 238,298       | 234,337    | 3,961                   | 98%        | 2%       |
| 26  | EEF2K          | 150,251       | 165,305    | (15,054)                | 110%       | -10%     |
| 27  | EIF2AK4(GCN2)  | 240,212       | 266,028    | (25,816)                | 111%       | -11%     |
| 28  | ERK1           | 181,820       | 202,357    | (20,537)                | 111%       | -11%     |
| 29  | FAK            | 103,915       | 122,894    | (18,979)                | 118%       | -18%     |
| 30  | FGFR1 (FLT2)   | 64,132        | 76,386     | (12,254)                | 119%       | -19%     |
| 31  | GCK            | 326,016       | 315,596    | 10,420                  | 97%        | 3%       |
| 32  | GRK1           | 4,695         | 4,425      | 270                     | 94%        | 6%       |
| 33  | GSK3 beta      | 259,502       | 237,980    | 21,522                  | 92%        | 8%       |
| 34  | Haspin (GSG2)  | 649,776       | 567,600    | 82,176                  | 87%        | 13%      |
| 35  | HER2           | 17,086        | 16,024     | 1,062                   | 94%        | 6%       |
| 36  | HIPK1          | 220,703       | 225,947    | (5,244)                 | 102%       | -2%      |
| 37  | HPK1           | 505,596       | 458,118    | 47,478                  | 91%        | 9%       |
| 38  | IGF1R          | 111,183       | 130,972    | (19,789)                | 118%       | -18%     |
| 39  | IKK alpha      | 23,730        | 23,944     | (214)                   | 101%       | -1%      |
| 40  | InsR           | 127,897       | 121,884    | 6,013                   | 95%        | 5%       |

|    |             |         |         |          |      |      |
|----|-------------|---------|---------|----------|------|------|
| 41 | IRAK2       | 11,167  | 12,213  | (1,046)  | 109% | -9%  |
| 42 | JAK3        | 251,132 | 247,535 | 3,597    | 99%  | 1%   |
| 43 | JNK1        | 260,451 | 281,079 | (20,628) | 108% | -8%  |
| 44 | KDR         | 143,399 | 123,268 | 20,131   | 86%  | 14%  |
| 45 | LCK         | 169,610 | 183,106 | (13,496) | 108% | -8%  |
| 46 | LIMK1       | 9,169   | 9,837   | (668)    | 107% | -7%  |
| 47 | LRRK2       | 13,019  | 8,637   | 4,382    | 66%  | 34%  |
| 48 | MAPKAPK2    | 684,637 | 663,505 | 21,132   | 97%  | 3%   |
| 49 | MEK1        | 11,065  | 9,870   | 1,195    | 89%  | 11%  |
| 50 | MEKK2       | 57,505  | 60,944  | (3,439)  | 106% | -6%  |
| 51 | MELK        | 196,694 | 190,938 | 5,756    | 97%  | 3%   |
| 52 | MET         | 22,779  | 18,378  | 4,401    | 81%  | 19%  |
| 53 | MLCK        | 77,724  | 81,195  | (3,471)  | 104% | -4%  |
| 54 | MNK1        | 145,676 | 124,582 | 21,094   | 86%  | 14%  |
| 55 | MST1        | 129,380 | 139,489 | (10,109) | 108% | -8%  |
| 56 | NDR         | 60,405  | 64,785  | (4,380)  | 107% | -7%  |
| 57 | NEK1        | 15,127  | 18,387  | (3,260)  | 122% | -22% |
| 58 | NIK         | 20,768  | 18,639  | 2,129    | 90%  | 10%  |
| 59 | p38 alpha   | 29,613  | 21,540  | 8,073    | 73%  | 27%  |
| 60 | p70S6K      | 99,007  | 85,893  | 13,114   | 87%  | 13%  |
| 61 | PAK1        | 13,614  | 7,852   | 5,762    | 58%  | 42%  |
| 62 | PDGFR alpha | 11,569  | 9,520   | 2,049    | 82%  | 18%  |
| 63 | PDK1        | 38,399  | 32,272  | 6,127    | 84%  | 16%  |
| 64 | PEAK1       | 48,788  | 47,952  | 836      | 98%  | 2%   |
| 65 | PHKG1       | 34,809  | 27,513  | 7,296    | 79%  | 21%  |
| 66 | PIM1        | 109,257 | 108,664 | 593      | 99%  | 1%   |
| 67 | PKAc alpha  | 663,764 | 705,431 | (41,667) | 106% | -6%  |
| 68 | PKC alpha   | 608,812 | 598,938 | 9,874    | 98%  | 2%   |
| 69 | PKC beta I  | 233,612 | 228,387 | 5,225    | 98%  | 2%   |
| 70 | PKC delta   | 103,168 | 122,939 | (19,771) | 119% | -19% |
| 71 | PKC mu      | 395,655 | 372,284 | 23,371   | 94%  | 6%   |
| 72 | PKD2        | 239,936 | 191,560 | 48,376   | 80%  | 20%  |
| 73 | PKN1/PRK1   | 2,048   | 1,319   | 729      | 64%  | 36%  |
| 74 | PLK1        | 18,240  | 17,587  | 653      | 96%  | 4%   |
| 75 | PRKG1       | 72,543  | 75,907  | (3,364)  | 105% | -5%  |
| 76 | RAF1(EF)    | 36,437  | 38,043  | (1,606)  | 104% | -4%  |
| 77 | RET         | 104,158 | 112,951 | (8,793)  | 108% | -8%  |
| 78 | RIPK1       | 83,489  | 65,885  | 17,604   | 79%  | 21%  |
| 79 | ROR2        | 6,517   | 4,254   | 2,263    | 65%  | 35%  |
| 80 | ROS1        | 224,185 | 241,677 | (17,492) | 108% | -8%  |
| 81 | SBK1        | 80,555  | 73,208  | 7,347    | 91%  | 9%   |
| 82 | SGK1        | 44,450  | 40,622  | 3,828    | 91%  | 9%   |
| 83 | SIK         | 71,648  | 77,581  | (5,933)  | 108% | -8%  |
| 84 | SRC         | 80,755  | 23,783  | 56,972   | 29%  | 71%  |
| 85 | STK19       | 14,557  | 12,624  | 1,933    | 87%  | 13%  |
| 86 | STK3        | 47,152  | 54,332  | (7,180)  | 115% | -15% |
| 87 | SYK         | 82,315  | 89,196  | (6,881)  | 108% | -8%  |
| 88 | TAK1-TAB1   | 45,160  | 48,799  | (3,639)  | 108% | -8%  |

|     |               |         |         |          |      |     |
|-----|---------------|---------|---------|----------|------|-----|
| 89  | TBK1          | 222,624 | 201,825 | 20,799   | 91%  | 9%  |
| 90  | TGFBR1 (ALK5) | 24,198  | 9,472   | 14,726   | 39%  | 61% |
| 91  | TIE2          | 47,076  | 38,640  | 8,436    | 82%  | 18% |
| 92  | TLK1          | 509,942 | 447,043 | 62,899   | 88%  | 12% |
| 93  | TOPK          | 87,715  | 67,645  | 20,070   | 77%  | 23% |
| 94  | TRKA          | 124,500 | 125,192 | (692)    | 101% | -1% |
| 95  | TSSK1B        | 166,193 | 155,343 | 10,850   | 93%  | 7%  |
| 96  | TTK           | 25,004  | 25,840  | (836)    | 103% | -3% |
| 97  | ULK1          | 145,631 | 158,046 | (12,415) | 109% | -9% |
| 98  | VRK1          | 9,162   | 9,109   | 53       | 99%  | 1%  |
| 99  | WNK1          | 21,189  | 18,051  | 3,138    | 85%  | 15% |
| 100 | ZAK           | 155,102 | 153,022 | 2,080    | 99%  | 1%  |

**Table S2:** Activity change observed in the LKB1 Kinase tested against Activator-3 at 200 $\mu$ M concentration

| Protein Kinase | Control (CPM) | Test (CPM) | % Change |
|----------------|---------------|------------|----------|
| LKB1           | 10984         | 11638      | 5%       |

**Table S3:** Evaluating the goodness of the representative structure obtained from MD simulations using PROCHECK server.

| Ramchandran Map                      | No. of residues | Percentage |
|--------------------------------------|-----------------|------------|
| Most favored regions                 | 889             | 85.8%      |
| Additional allowed regions           | 128             | 12.4%      |
| Generously allowed regions           | 13              | 1.3%       |
| Disallowed regions                   | 6               | 0.6%       |
| Non-glycine and non-proline residues | 1036            | 100.0%     |

**Table S4:** Heterotrimeric human AMPK crystal structures available in PDB.

| PDBID | Isoform                   | Organism     | Inhibitor and/or activator    | Modifications      | References                         |
|-------|---------------------------|--------------|-------------------------------|--------------------|------------------------------------|
| 5ISO  | $\alpha 2\beta 1\gamma 1$ | Homo sapiens | AMP, Staurosporine, 992       | 108-SEP            | NA                                 |
| 4ZHX  | $\alpha 2\beta 1\gamma 1$ | Homo sapiens | AMP, C2Z, C1V, Staurosporine, | 172-TPO<br>108-SEP | Lagendorf et al. 2016 <sup>1</sup> |
| 5EZV  | $\alpha 2\beta 1\gamma 1$ | Homo sapiens | C2Z, C1V, Staurosporine       | 172-TPO<br>108-SEP | Lagendorf et al. 2016 <sup>1</sup> |
| 4RER  | $\alpha 1\beta 2\gamma 1$ | Homo sapiens | AMP, HEPES, B-                | 172-TPO            | Li et al. 2015 <sup>2</sup>        |

|                        |                           |                                                                        |                                |                    |                               |
|------------------------|---------------------------|------------------------------------------------------------------------|--------------------------------|--------------------|-------------------------------|
|                        |                           |                                                                        | cyclodextrin, Staurosporine    | 108-SEP            |                               |
| <b>4REW</b>            | $\alpha 1\beta 2\gamma 1$ | Homo sapiens                                                           | AMP, Staurosporine             | -                  | Li et al. 2015 <sup>2</sup>   |
| <b>4CFE</b>            | $\alpha 2\beta 1\gamma 1$ | Homo sapiens                                                           | AMP, Staurosporine, 991        | 172-TPO<br>108-SEP | Xiao et al. 2013 <sup>3</sup> |
| <b>4CFF</b>            | $\alpha 2\beta 1\gamma 1$ | Homo sapiens                                                           | AMP, Staurosporine,<br>A769662 | 172-TPO<br>108-SEP | Xiao et al. 2013 <sup>3</sup> |
| <b>4CFH<br/>(2Y94)</b> | $\alpha 1\beta 2\gamma 1$ | $\alpha 1, \gamma 1$ -Rattus<br>norvegicus<br>$\beta 2$ - Homo sapiens | AMP, Staurosporine             | 172-TPO            | Xiao et al. 2011 <sup>4</sup> |

**FigureS1**

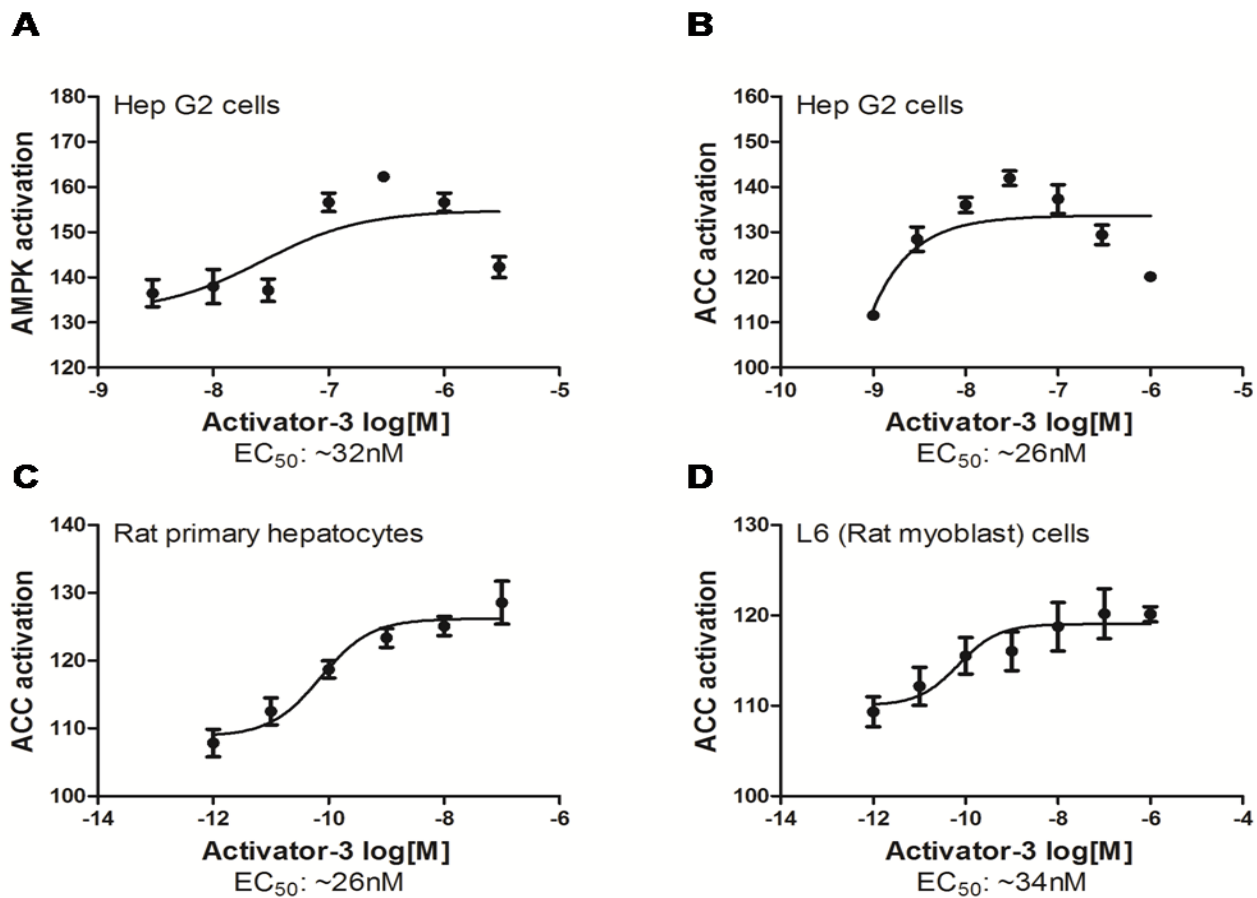

Figure S2

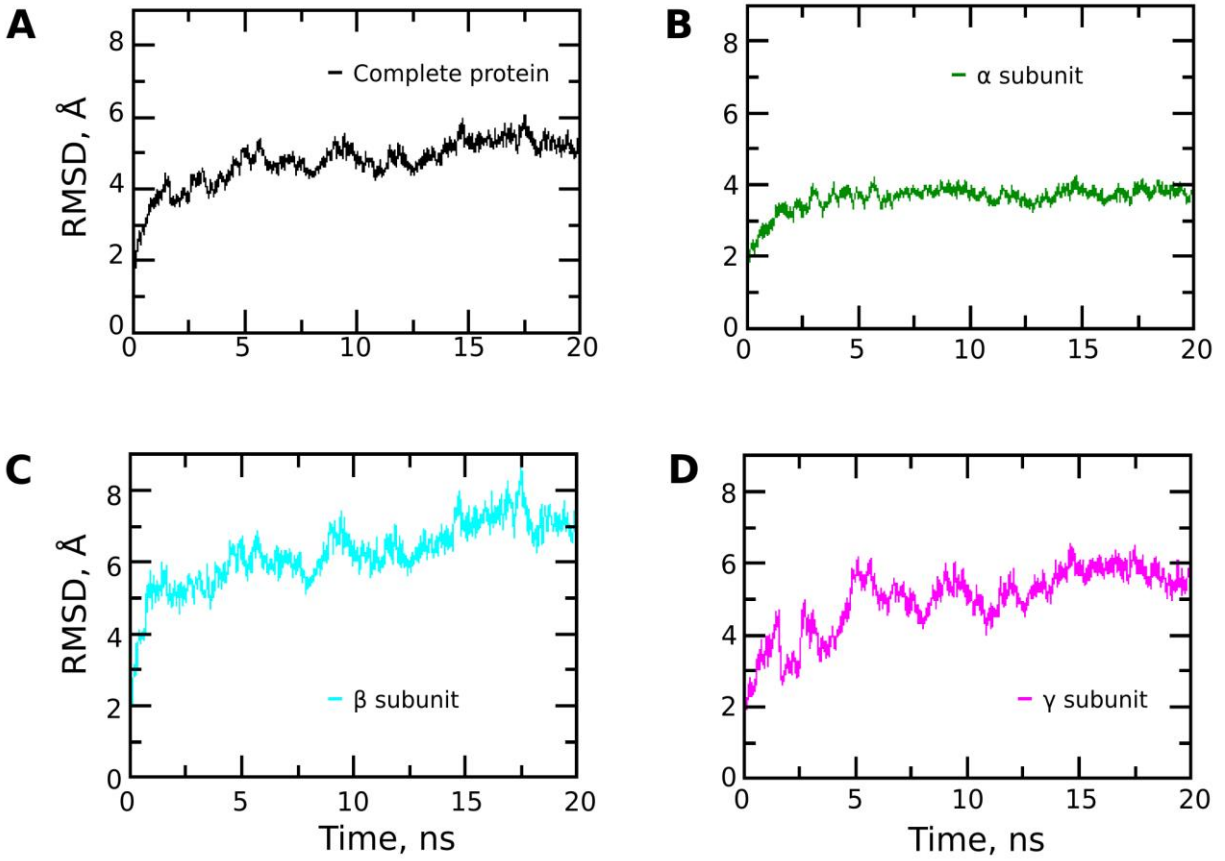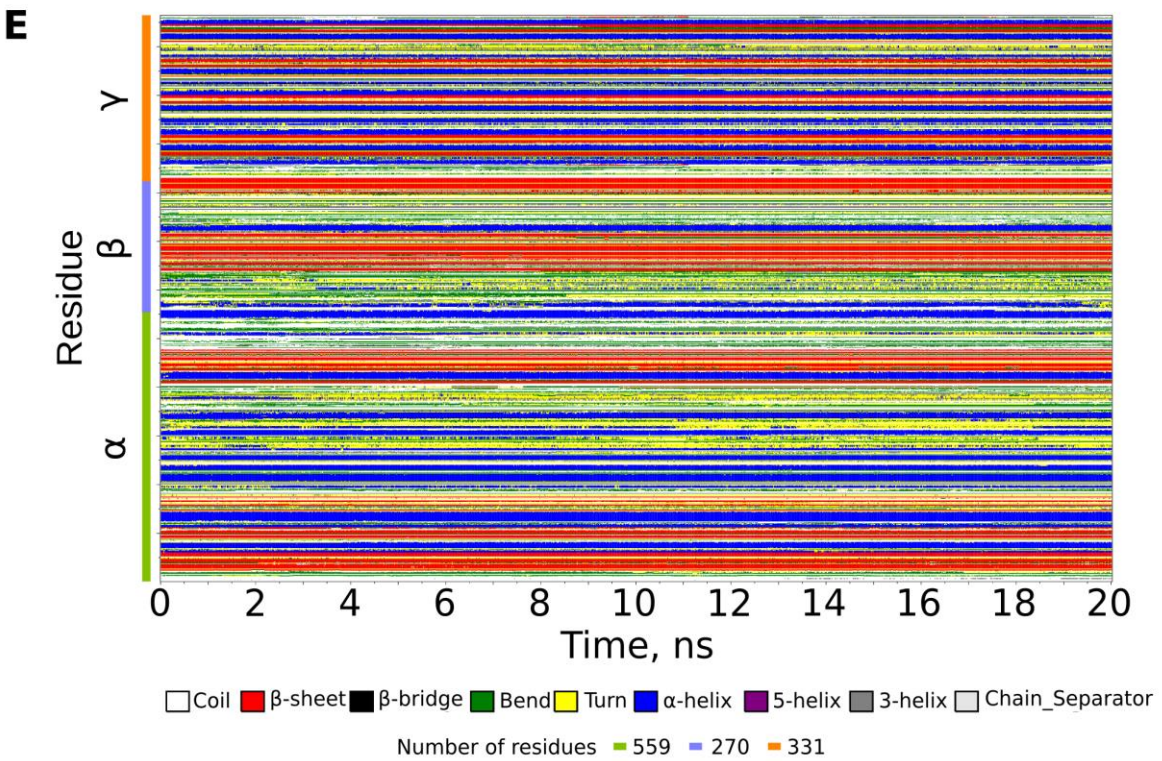



Figure S3

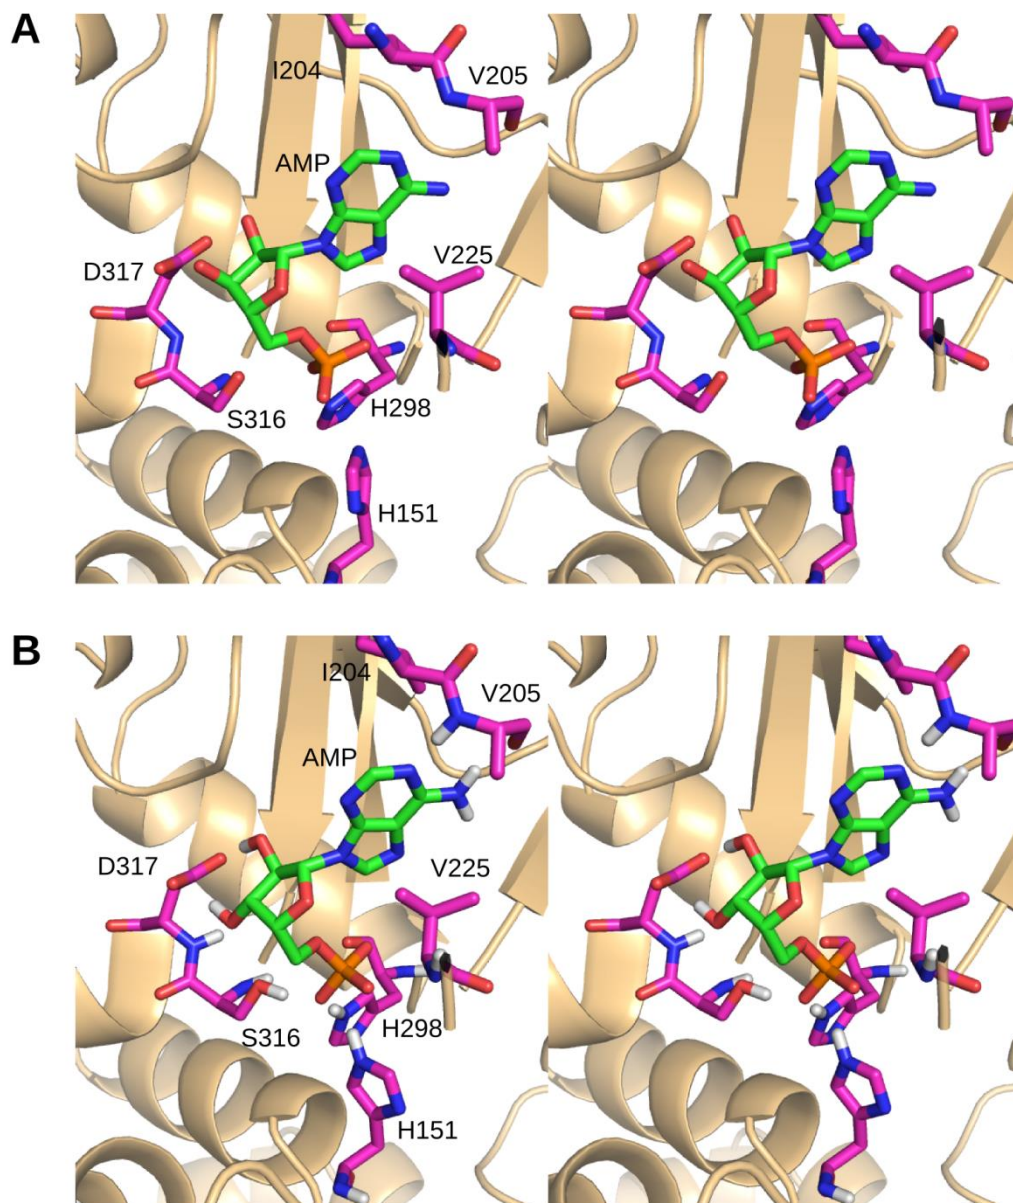

Figure S4

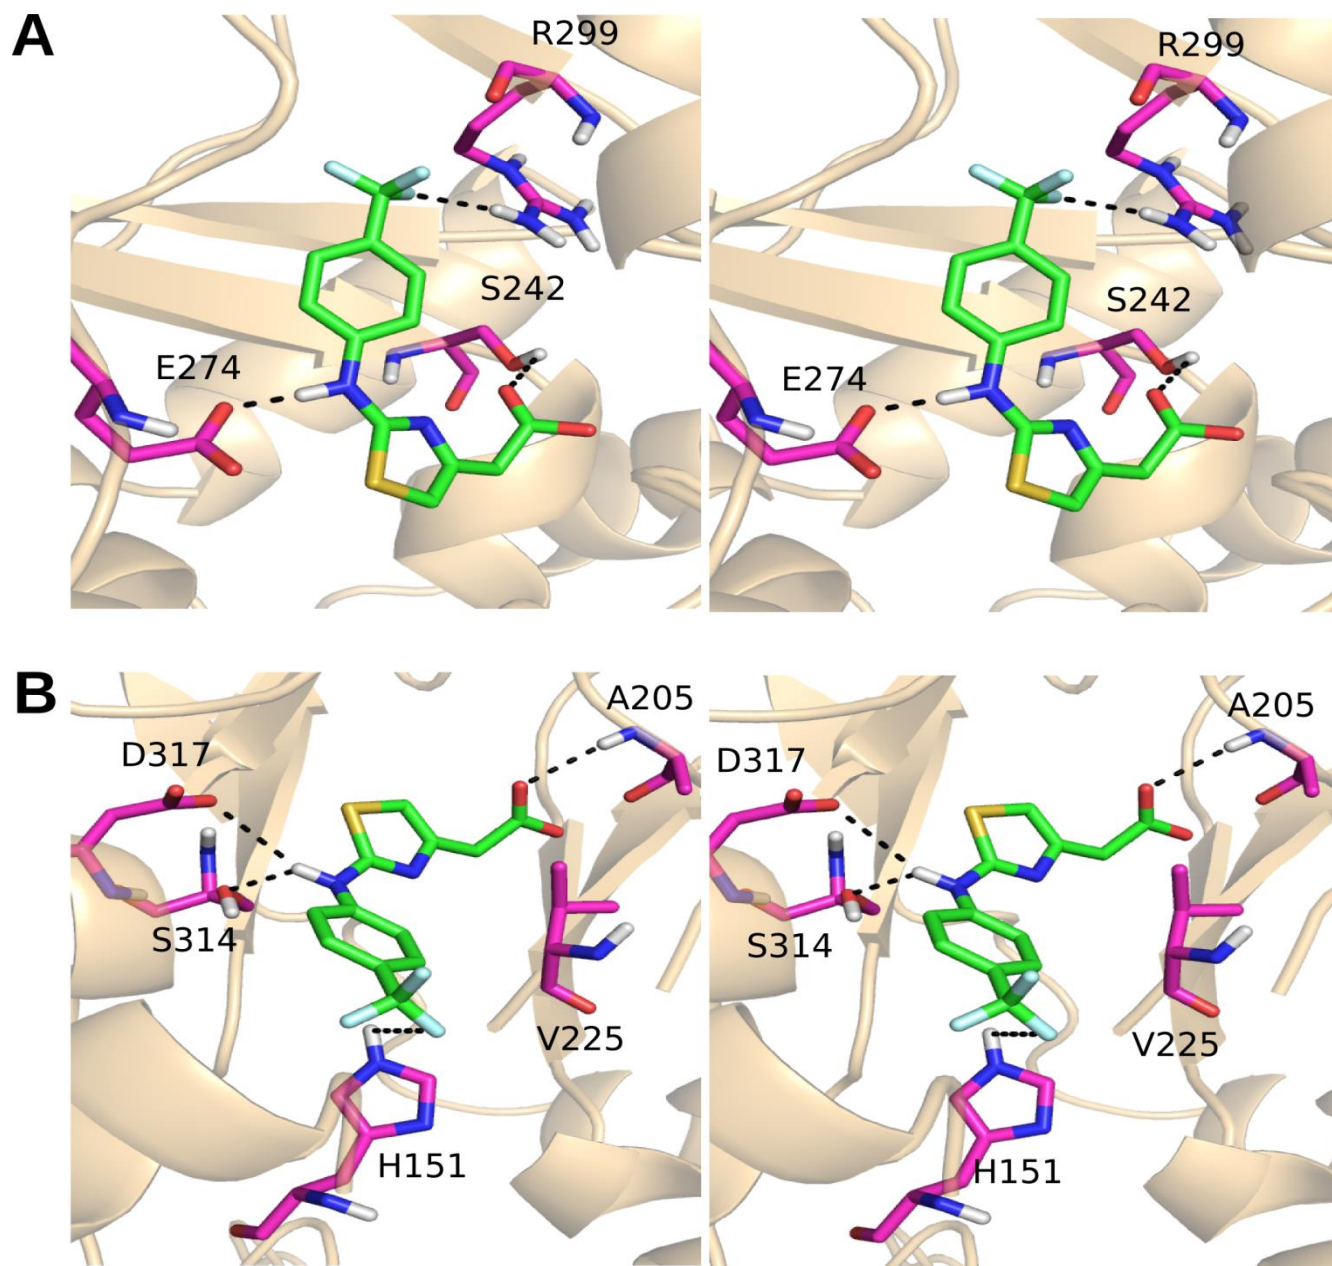



Figure S5

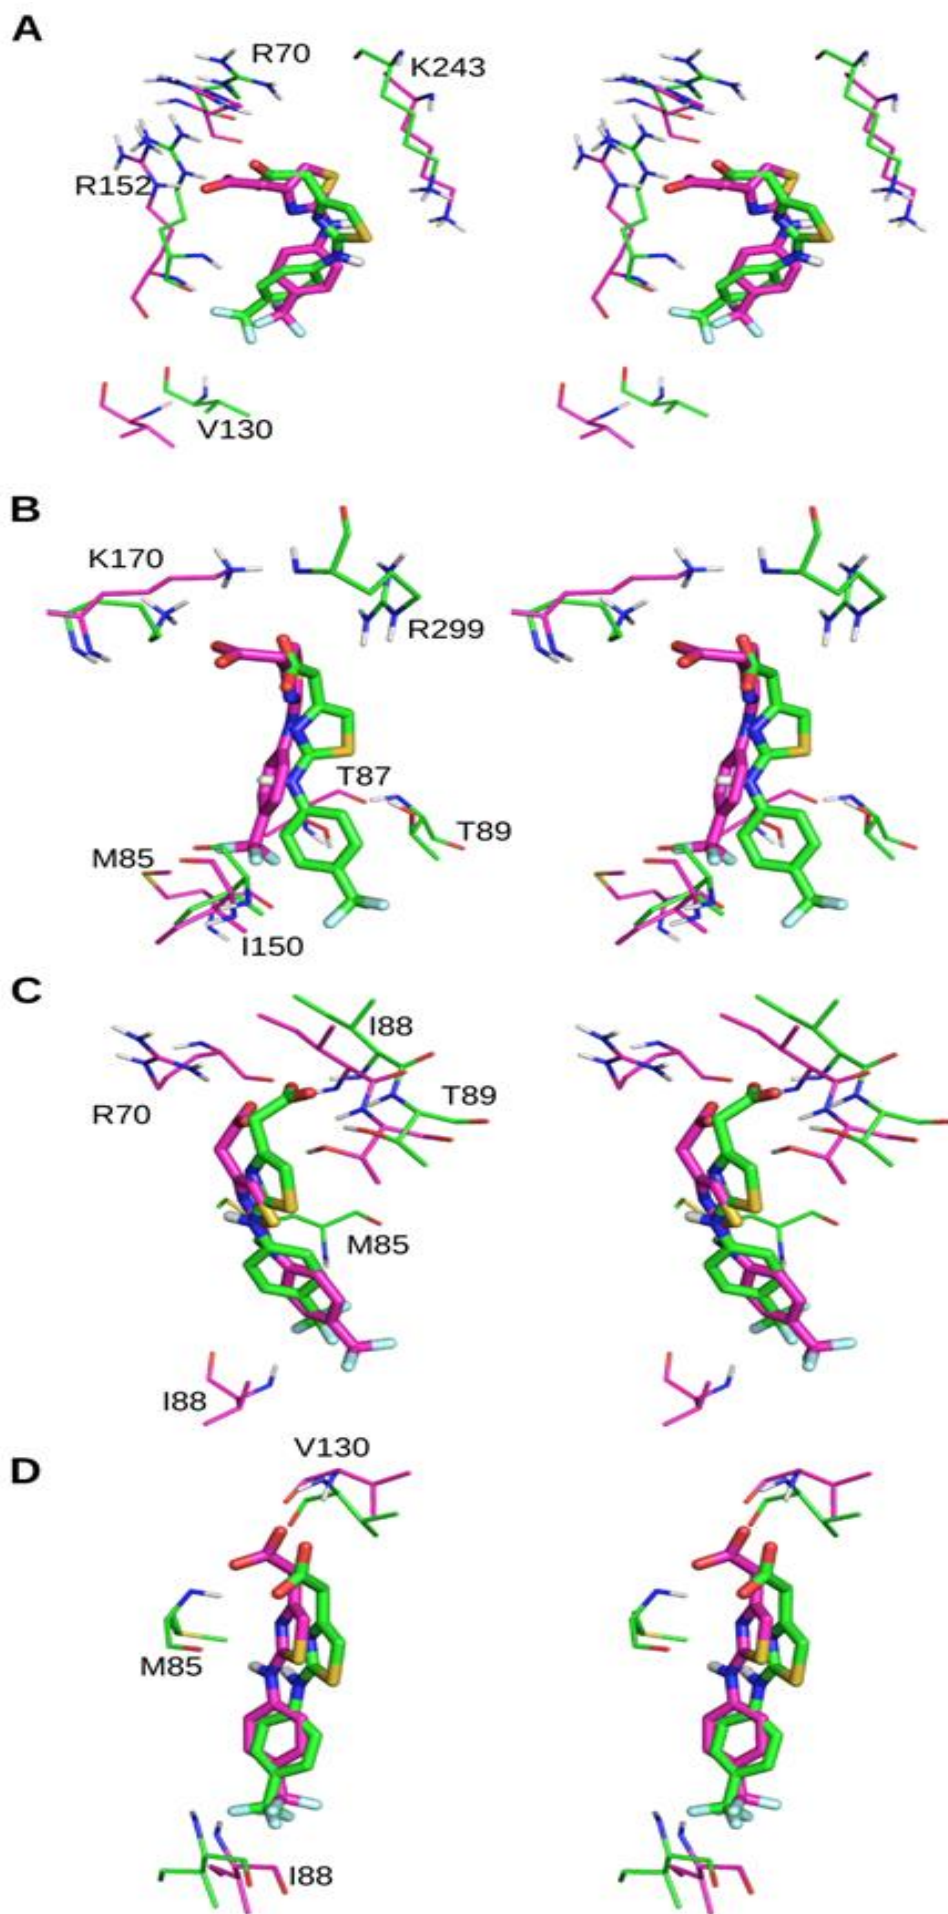

Figure S6

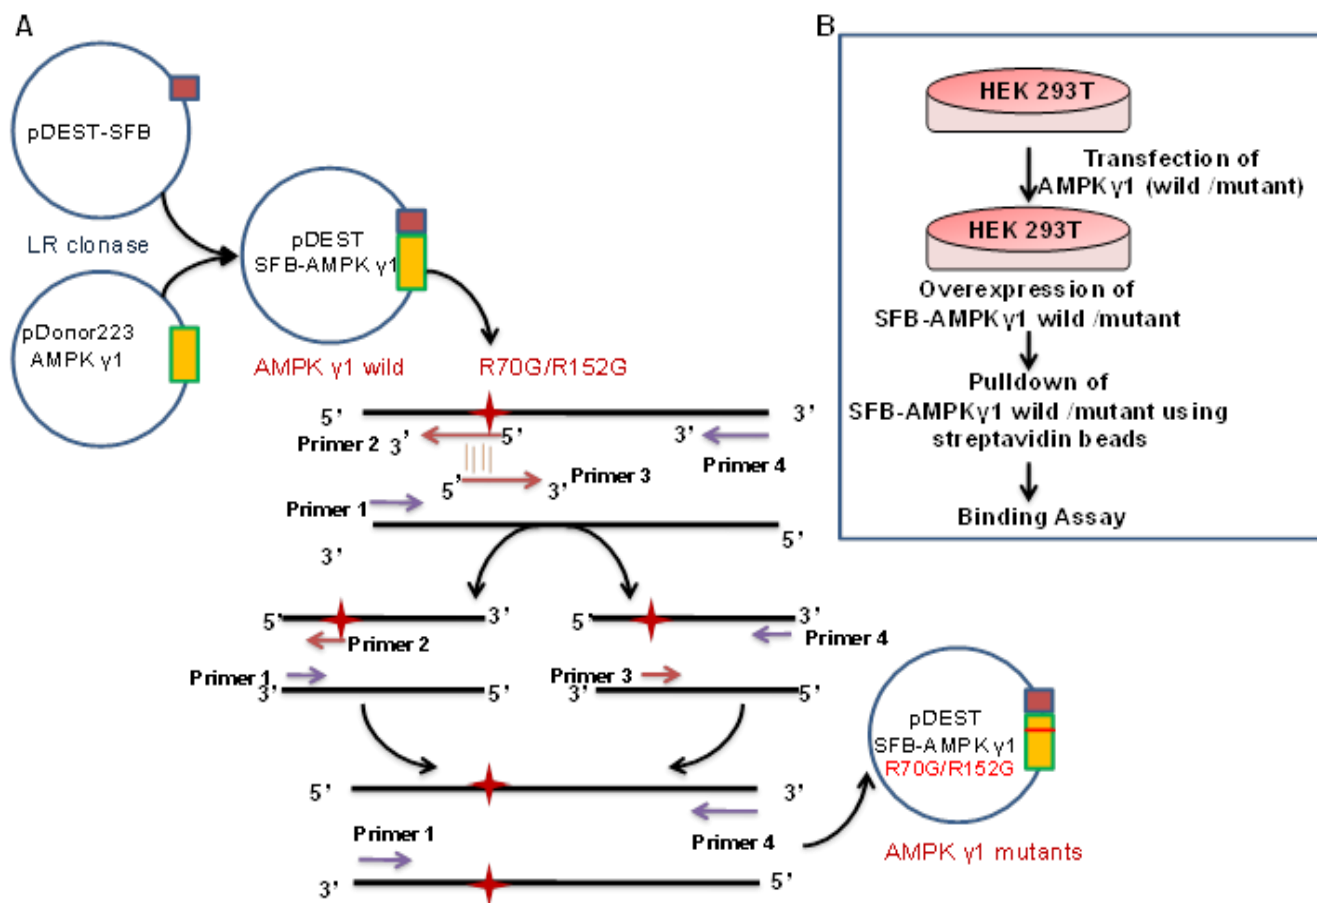

Figure S7

|             | Pharmacokinetic profile in rat<br>Activator-3 (30mg/kg) |                                              |               |
|-------------|---------------------------------------------------------|----------------------------------------------|---------------|
|             | AUC (0-t) $\mu\text{g}\cdot\text{h}/\text{ml}$          | $C_{\text{max}}$ ( $\mu\text{g}/\text{ml}$ ) | $t_{1/2}$ (h) |
| Activator-3 | 978                                                     | 109                                          | 4.11          |

- ❖ Good PK profile
- ❖ Bioavailability 100%
- ❖ No significant BBB penetration
- ❖ Molecular weight of Activator-3 = 302
- ❖ AUC (978  $\mu\text{g}\cdot\text{h}/\text{ml}$ ) = 3.3mM
- ❖  $C_{\text{max}}$  (109 $\mu\text{g}/\text{ml}$ ) = 360 $\mu\text{M}$

Figure S8

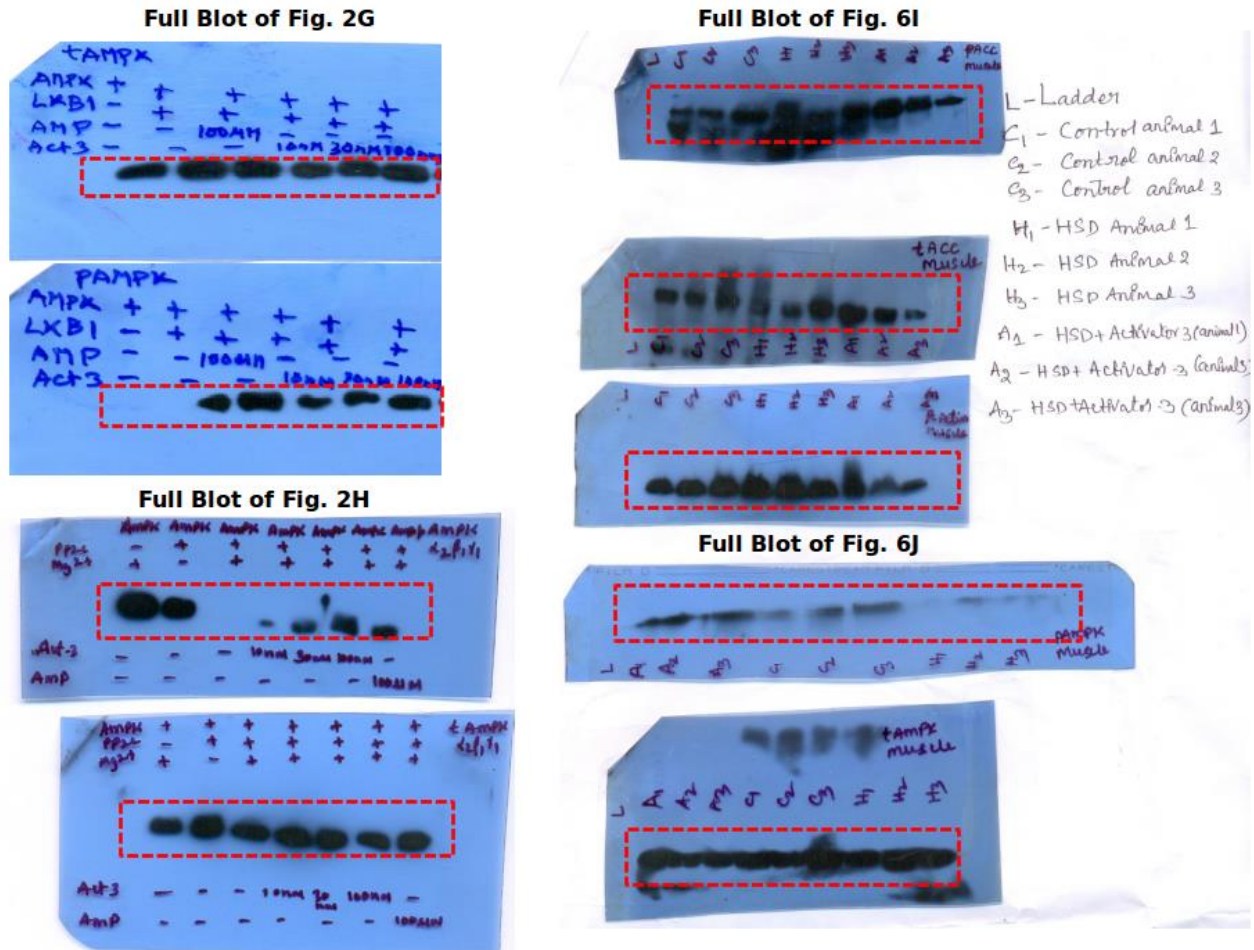



Figure S9:

**ALPHA Subunit**

|                           |     |                                                                     |     |
|---------------------------|-----|---------------------------------------------------------------------|-----|
| AAPK1_HUMAN<br>4cfh_a.pdb | 1   | <b>MRRLLSSWRKMATAEKQKHGDRVKIGHYILGDTLGVGTFGKVKVKGKHEL</b> TG        | 50  |
|                           | 1   | -----RVKIGHYILGDTLGVGTFGKVKVKGKHELTG                                | 30  |
| AAPK1_HUMAN<br>4cfh_a.pdb | 51  | HKVAVKILNRQKIRSLDVVGKIRREIQNLKLFRRPHI <b>IKLYQVISTP</b> SDI         | 100 |
|                           | 31  | HKVAVKILNRQKIRSLDVVGKIRREIQNLKLFRRPHI <b>IKLYQVISTP</b> SDI         | 80  |
| AAPK1_HUMAN<br>4cfh_a.pdb | 101 | FMVMEYVSGGELFDYICKNGRLDEKESRRLFQQILSGVDYCHRRMVVHRD                  | 150 |
|                           | 81  | FMVMEYVSGGELFDYICKNGRLDEKESRRLFQQILSGVDYCHRRMVVHRD                  | 130 |
| AAPK1_HUMAN<br>4cfh_a.pdb | 151 | LKPENVLLDAHNAKIADFGLSNMMSDGEFLRTSCGSPNYAAPEVISGRL                   | 200 |
|                           | 131 | LKPENVLLDAHNAKIADFGLSNMMSDGEFLRXSCGSPNYAAPEVISGRL                   | 180 |
| AAPK1_HUMAN<br>4cfh_a.pdb | 201 | YAGPEVDIWSGGVILYALLCGTLPFDDDHVPTLFKKICDGIFYTPQYLN <b>P</b>          | 250 |
|                           | 181 | YAGPEVDIWSGGVILYALLCGTLPFDDDHVPTLFKKICDGIFYTPQYLN <b>P</b>          | 230 |
| AAPK1_HUMAN<br>4cfh_a.pdb | 251 | SVISLLKHMLQVDPMKRATIKDIREHEWFKQDLPKYLFPED <b>PSYSSTMI</b> D         | 300 |
|                           | 231 | SVISLLKHMLQVDPMKRATIKDIREHEWFKQDLPKYLFPED-----                      | 271 |
| AAPK1_HUMAN<br>4cfh_a.pdb | 301 | <b>DEALKEVCEKFECS</b> EEVLSCLYNRNHQDPLAVAYHLIIDNRRIMNEAKD           | 350 |
|                           | 272 | -----AVAYHLIIDNRRIMNEAKD                                            | 290 |
| AAPK1_HUMAN<br>4cfh_a.pdb | 351 | FYLATSPPPDSFLDDHHLTRPHPERVFFLVAETPRAR <b>HRTLDELNPQKSKHQ</b>        | 400 |
|                           | 291 | FYLATSPPPDSFLDDHHLTRPHPERVFFLVAETPRA-----                           | 325 |
| AAPK1_HUMAN<br>4cfh_a.pdb | 401 | <b>GVRK</b> AKWHLGIRSQSRPNIDMAEVCRAIKQLDYEWKVVNPYYLVRVRK <b>KNP</b> | 450 |
|                           | 326 | ----AKWHLGIRSQSRPNIDMAEVCRAIKQLDYEWKVVNPYYLVRVRK <b>KNP</b>         | 371 |
| AAPK1_HUMAN<br>4cfh_a.pdb | 451 | VTSTYSKMSLQLYQVDSRTYLLDFRSIDDEI <b>TEAKSGTATPQRSGSVSNY</b>          | 500 |
|                           | 372 | VTSTFSKMSLQLYQVDSRTYLLDFRSIDDEI-----                                | 402 |
| AAPK1_HUMAN<br>4cfh_a.pdb | 501 | <b>RSCQRSDSDAEAQGSSEVSLTSSVTSLDSSPVDLTPRPGSHTIEFFEMC</b>            | 550 |
|                           | 403 | -----                                                               | 402 |
| AAPK1_HUMAN<br>4cfh_a.pdb | 551 | <b>ANLIKILAQ</b>                                                    | 559 |
|                           | 403 | -----                                                               | 402 |

**Beta Subunit**

|                           |     |                                                                            |     |
|---------------------------|-----|----------------------------------------------------------------------------|-----|
| AAKB1_HUMAN<br>4cff_b.pdb | 1   | <b>MNGTSSERAALERHGHGKTPRRDSSGGTKDGRPKILMDSPEADLPHSE</b>                    | 50  |
|                           | 1   | -----                                                                      | 0   |
| AAKB1_HUMAN<br>4cff_b.pdb | 51  | <b>EIKAPEKEEF</b> LAQHLDLEVNDKAPAAQARPTVFRWTGGGKEVYLSGSFNNW                | 100 |
|                           | 1   | -----RPTVFRWTGGGKEVYLSGSFNNW                                               | 23  |
| AAKB1_HUMAN<br>4cff_b.pdb | 101 | SKLPLTRSHNNFVAILDLPEGEHQYKFFVDGQWTHDPSEP <b>IVTSQLGTVN</b>                 | 150 |
|                           | 24  | SKLPLTRXHNHFVAILDLPEGEHQYKFFVDGQWTHDPSEP <b>IVTSQLGTVN</b>                 | 73  |
| AAKB1_HUMAN<br>4cff_b.pdb | 151 | NIQVKKTDFEVDALMVDSQK <b>SDVSELSSPPGPYHQEPYVCKPEERF</b>                     | 200 |
|                           | 74  | NIQVKKTDFEVDALMVDSQK-----YHQEPYV-----                                      | 103 |
| AAKB1_HUMAN<br>4cff_b.pdb | 201 | <b>RAPP</b> ILPPLLQVILNKDTGISCDPALLPEPNHVMLNHL <b>YALS</b> IKDGMV <b>M</b> | 250 |
|                           | 104 | --PPILPPLLQVILNKDTGISCDPALLPEPNHVMLNHL <b>YALS</b> IKDGMV <b>M</b>         | 151 |
| AAKB1_HUMAN<br>4cff_b.pdb | 251 | LSATHRYKKKYVT <b>TLLYKPI</b>                                               | 270 |
|                           | 152 | LSATHRYKKKYVT <b>TLLYKPI</b>                                               | 171 |

**Gamma Subunit**

|                           |     |                                                                      |     |
|---------------------------|-----|----------------------------------------------------------------------|-----|
| AAKG1_HUMAN<br>4cff_e.pdb | 1   | <b>METVISSDSSPAVENEHPQETPESNN</b> SVYTSFMKSHRCYDLIPTSSKL <b>VV</b>   | 50  |
|                           | 1   | -----SVYTSFMKSHRCYDLIPTSSKL <b>VV</b>                                | 24  |
| AAKG1_HUMAN<br>4cff_e.pdb | 51  | FDTSLQVKKAFFALVTNGVRAAPLWDSKKQSFV <b>GMLTITDFINILHRYK</b>            | 100 |
|                           | 25  | FDTSLQVKKAFFALVTNGVRAAPLWDSKKQSFV <b>GMLTITDFINILHRYK</b>            | 74  |
| AAKG1_HUMAN<br>4cff_e.pdb | 101 | SALVQIYELEEHHK <b>IETWREVYLQDSFKPLVCISPNASLFD</b> AVSS <b>LIRNKI</b> | 150 |
|                           | 75  | SALVQIYELEEHHK <b>IETWREVYLQDSFKPLVCISPNASLFD</b> AVSS <b>LIRNKI</b> | 124 |
| AAKG1_HUMAN<br>4cff_e.pdb | 151 | HRLPVIDPESGNTLYIL <b>THKRILKFLKLFITEFPKPEFMSKSLEELQIGT</b>           | 200 |
|                           | 125 | HRLPVIDPESGNTLYIL <b>THKRILKFLKLFITEFPKPEFMSKSLEELQIGT</b>           | 174 |
| AAKG1_HUMAN<br>4cff_e.pdb | 201 | YANIAMVRTTPVYVALGIFVQHRVSALPVVDEKGRVVDI <b>YSKFDVINLA</b>            | 250 |
|                           | 175 | YANIAMVRTTPVYVALGIFVQHRVSALPVVDEKGRVVDI <b>YSKFDVINLA</b>            | 224 |
| AAKG1_HUMAN<br>4cff_e.pdb | 251 | AEKTYNNLDVSVTKALQHRSHYFEGVLKCYL <b>HETLETIINRLVEAEVHRL</b>           | 300 |
|                           | 225 | AEKTYNNLDVSVTKALQHRSHYFEGVLKCYL <b>HETLETIINRLVEAEVHRL</b>           | 274 |
| AAKG1_HUMAN<br>4cff_e.pdb | 301 | VVDENDVVKGIVSLSDILQALVLT <b>GGEKKP</b>                               | 331 |
|                           | 275 | VVDENDVVKGIVSLSDILQALVLT-----                                        | 299 |

## Legends of the Supplementary figures

**Figure S1:** Activator-3 activates AMPK and ACC in *in vitro* cell based assays. pAMPK (**A**) and pACC (**B, C and D**) based dose response curve of Activator-3 in HepG2 cells (**A,B**) primary Hepatocytes and L6 muscle cells (**C,D**).

**Figure S2:** Root mean square deviation (RMSD) of the protein backbone with respect to the energy minimized modeled structure for **A.** complete protein, **B.**  $\alpha$  subunit, **C.**  $\beta$  subunit, **D.**  $\gamma$  subunit. **E.** DSSP plot showing secondary structure of the protein during the simulation. The color code for each of the secondary structure is given below the plot.  $\alpha$ ,  $\beta$  and  $\gamma$  subunits on the y-axis are demarcated using green, blue and magenta colors respectively.

**Figure S3:** Residues interacting with AMP molecule in the **A.** crystal structure (PDB: 4CFF) and **B.** Homology modeled structure. AMP and interacting residues are shown in green and magenta sticks respectively.

**Figure S4:** AMPK-activator-3 docked complexes for **A.** Site 3; **B.** Site 4. Activator-3 and interacting residues are shown in green and magenta sticks respectively.

**Figure S5:** Position of the Activator-3 before (green) and after 10ns MD simulation (magenta) in **A.** Wild-type; **B.** R70G mutant; **C.** R152G mutant; **D.** R70G&R152G (double) mutant

**Figure S6:** **A.** Schematic diagram of the constructs of human  $\alpha 1\beta 1\gamma 1$  AMPK isoform and its mutants. **B.** Method of overexpression and purification of recombinant and its mutants human AMPK  $\alpha 1\beta 1\gamma 1$  in HEK-293T cells used for enzyme assay.

**Figure S7:** Pharmacokinetics profile of Activator-3 in rats: HSD rats were treated with Activator-3 at 30mg/kg dose and different pharmacokinetics parameters were measured.

**Figure S8:** western blot raw data for pACC, total ACC,  $\beta$ -Actin, pAMPK and total AMPK for rat muscle tissue, LKB1 mediated phosphorylation of AMPK stimulated by Activator-3 and protection Assay using  $\alpha 2\beta 1\gamma 1$ .

**Figure S9:** Sequence alignment of  $\alpha$ ,  $\beta$  and  $\gamma$  subunits with the template structure that was used for modeling. The missing residues (pink) were modeled using either template based or ab initio modeling.

### Supplementary references

1. Langendorf, C. G. *et al.* Structural basis of allosteric and synergistic activation of AMPK by furan-2-phosphonic derivative C2 binding. *Nat. Commun.* **7**, 10912 (2016).
2. Li, X. *et al.* Structural basis of AMPK regulation by adenine nucleotides and glycogen. *Cell Res.* **25**, 50–66 (2015).
3. Xiao, B. *et al.* Structural basis of AMPK regulation by small molecule activators. *Nat. Commun.* **4**, 3017 (2013).
4. Xiao, B. *et al.* Structure of mammalian AMPK and its regulation by ADP. *Nature* **472**, 230–233 (2011).
